# Supplementary material for: Wohlbefinden nach dem Wechsel an weiterführende Schulen während der Coronapandemie
Source: Springer Nature journal article supplement (doi:10.1007/s11553-023-01081-0), 2023-12-05
Supplement: MOESM1 [file 26495436]

**Online Appendix**

Tabelle A1. Maßnahmen vor und nach dem Übergang an die weiterführende Schule differenziert nach stattgefunden und entfallene Maßnahmen aus Sicht der Schulkinder, Eltern und des Lehpersonals

| **stattgefundene Maßnahmen** | **entfallene Maßnahmen** |
| --- | --- |
| - Austausch zwischen den Lehrpersonen der Grund- und weiterführenden Schule - Tag der offenen Tür an der weiterführenden Schule während der Grundschulzeit - Hospitationstag an der weiterführenden Schule während der Grundschulzeit - Einschulungsfeier - Klassenlehrerunterricht - Mentoring von Schulkindern höherer Jahrgangsstufen für Schulkindern der Klasse 5 | - Abschiedsfeier in der Grundschule - Veranstaltungen für Eltern (z. B. Elternabend vor dem Übergang, Elternnachmittag) - Tag der offenen Tür an weiterführender Schule während der Grundschulzeit - Hospitationstag an der weiterführenden Schule während der Grundschulzeit - Informationsabend für Schulkinder und Eltern - Aktivitäten der Klasse (z. B. Klassenfahrt, Wandertag) |
